# Supplementary material for: Facial width-to-height ratio differs by social rank across organizations, countries, and value systems
Source: PLoS One. 2017 Nov 9;12(11):e0187957. doi: 10.1371/journal.pone.0187957 (PMC5679545; doi:10.1371/journal.pone.0187957)
Supplement: S1 File — (XLSX) [file pone.0187957.s001.xlsx]

## Sheet: Sheet1
Code	Name	Surname	Age	fWHR_rater1	fWHR_rater2	fWHR_rater3	fWHR_mean_rater1and2	fWHR_mean_rater1and3	CEO_since	group_name	Index_group	smile_rating_1	smile_rating_2	smile_rating_mean	indexPic_doubleUse	GreenRanking2012	GreenScore2012	Revenue2012	Corporate_Givings_2012	Employee_Satisfaction_with_company	Satisfaction_with_CEO	Number_of_Reviews_EmpSat	Number_of_Reviews_CEOs
EMWmale32neutral			32	1.71204	1.69378	#NULL!	1.70291	#VALUE!	#NULL!	controls (Minear & Park)	0	0	1	0.5	1
EMWmale40neutral			40	2.01533	1.97386	#NULL!	1.99459	#VALUE!	#NULL!	controls (Minear & Park)	0	0	1	0.5	2
EMWmale52neutral			52	1.55297	1.53441	#NULL!	1.54369	#VALUE!	#NULL!	controls (Minear & Park)	0	0	0	0	3
JWmale26happy			26	1.9845	2.01112	#NULL!	1.99781	#VALUE!	#NULL!	controls (Minear & Park)	0	4	4	4	92
JWmale38happy			38	2.09134	2.0679	#NULL!	2.07962	#VALUE!	#NULL!	controls (Minear & Park)	0	3	3	3	93
JWmale38neutral			38	2.18626	2.14453	#NULL!	2.16539	#VALUE!	#NULL!	controls (Minear & Park)	0	0	0	0	4
JWmale70happy			70	2.08628	1.85089	#NULL!	1.96859	#VALUE!	#NULL!	controls (Minear & Park)	0	4	3	3.5	54
JWmale71happy			71	1.85932	1.93614	#NULL!	1.89773	#VALUE!	#NULL!	controls (Minear & Park)	0	3	2	2.5	94
JWmale72-2happy			72	1.96737	2.06327	#NULL!	2.01532	#VALUE!	#NULL!	controls (Minear & Park)	0	4	2	3	95
JWmale83happy			83	1.97736	1.92086	#NULL!	1.94911	#VALUE!	#NULL!	controls (Minear & Park)	0	3	3	3	14
neutral_o_m_1			64	1.76247	1.74476	#NULL!	1.75361	#VALUE!	#NULL!	controls (Minear & Park)	0	0	0	0	5
neutral_o_m_11			73	1.63102	1.5993	#NULL!	1.61516	#VALUE!	#NULL!	controls (Minear & Park)	0	0	0	0	6
neutral_o_m_12			76	1.81037	1.7009	#NULL!	1.75564	#VALUE!	#NULL!	controls (Minear & Park)	0	1	1	1	7
neutral_o_m_13			78	1.97057	1.9149	#NULL!	1.94273	#VALUE!	#NULL!	controls (Minear & Park)	0	1	1	1	8
neutral_o_m_15			80	1.70715	1.62965	#NULL!	1.6684	#VALUE!	#NULL!	controls (Minear & Park)	0	0	1	0.5	9
neutral_o_m_16			81	1.70382	1.68895	#NULL!	1.69639	#VALUE!	#NULL!	controls (Minear & Park)	0	0	0	0	10
neutral_o_m_18			82	1.86653	1.84411	#NULL!	1.85532	#VALUE!	#NULL!	controls (Minear & Park)	0	0	0	0	11
neutral_o_m_19			83	1.67465	1.5752	#NULL!	1.62492	#VALUE!	#NULL!	controls (Minear & Park)	0	0	1	0.5	12
neutral_o_m_2			65	1.69237	1.65091	#NULL!	1.67164	#VALUE!	#NULL!	controls (Minear & Park)	0	0	0	0	13
neutral_o_m_20			83	1.90773	1.82788	#NULL!	1.86781	#VALUE!	#NULL!	controls (Minear & Park)	0	1	1	1	14
neutral_o_m_21			88	1.90384	1.84169	#NULL!	1.87277	#VALUE!	#NULL!	controls (Minear & Park)	0	1	0	0.5	15
neutral_o_m_22			88	1.63301	1.60104	#NULL!	1.61702	#VALUE!	#NULL!	controls (Minear & Park)	0	0	0	0	16
neutral_o_m_23			91	1.78328	1.6561	#NULL!	1.71969	#VALUE!	#NULL!	controls (Minear & Park)	0	0	0	0	17
neutral_o_m_25			78	1.6518	1.62684	#NULL!	1.63932	#VALUE!	#NULL!	controls (Minear & Park)	0	0	0	0	18
neutral_o_m_26			79	1.59858	1.51988	#NULL!	1.55923	#VALUE!	#NULL!	controls (Minear & Park)	0	0	1	0.5	19
neutral_o_m_27			82	1.72578	1.67743	#NULL!	1.70161	#VALUE!	#NULL!	controls (Minear & Park)	0	0	0	0	20
neutral_o_m_28			66	1.85977	1.86288	#NULL!	1.86133	#VALUE!	#NULL!	controls (Minear & Park)	0	0	0	0	21
neutral_o_m_29			68	1.69296	1.60181	#NULL!	1.64738	#VALUE!	#NULL!	controls (Minear & Park)	0	0	0	0	42
neutral_o_m_30			70	1.76864	1.72101	#NULL!	1.74482	#VALUE!	#NULL!	controls (Minear & Park)	0	0	0	0	43
neutral_o_m_31			71	1.62936	1.67813	#NULL!	1.65375	#VALUE!	#NULL!	controls (Minear & Park)	0	0	0	0	44
neutral_o_m_32			71	1.64587	1.61463	#NULL!	1.63025	#VALUE!	#NULL!	controls (Minear & Park)	0	0	0	0	45
neutral_o_m_33			72	1.78478	1.73649	#NULL!	1.76064	#VALUE!	#NULL!	controls (Minear & Park)	0	0	1	0.5	46
neutral_o_m_35			77	1.70209	1.65234	#NULL!	1.67721	#VALUE!	#NULL!	controls (Minear & Park)	0	0	0	0	47
neutral_o_m_36			79	1.67305	1.62228	#NULL!	1.64767	#VALUE!	#NULL!	controls (Minear & Park)	0	0	0	0	48
neutral_o_m_37			79	1.82351	1.75042	#NULL!	1.78697	#VALUE!	#NULL!	controls (Minear & Park)	0	0	0	0	49
neutral_o_m_38			79	1.71908	1.63665	#NULL!	1.67786	#VALUE!	#NULL!	controls (Minear & Park)	0	0	0	0	50
neutral_o_m_39			88	1.58963	1.54722	#NULL!	1.56842	#VALUE!	#NULL!	controls (Minear & Park)	0	0	0	0	51
neutral_o_m_4			67	1.61811	1.58406	#NULL!	1.60109	#VALUE!	#NULL!	controls (Minear & Park)	0	0	0	0	52
neutral_o_m_40			65	1.98261	1.93098	#NULL!	1.9568	#VALUE!	#NULL!	controls (Minear & Park)	0	0	0	0	53
neutral_o_m_6			70	1.92634	1.95483	#NULL!	1.94058	#VALUE!	#NULL!	controls (Minear & Park)	0	1	1	1	54
neutral_y_m_1			19	1.71564	1.69171	#NULL!	1.70368	#VALUE!	#NULL!	controls (Minear & Park)	0	0	0	0	55
neutral_y_m_10			23	1.91777	1.90052	#NULL!	1.90915	#VALUE!	#NULL!	controls (Minear & Park)	0	1	2	1.5	56
neutral_y_m_11			32	1.69484	1.65728	#NULL!	1.67606	#VALUE!	#NULL!	controls (Minear & Park)	0	0	0	0	1
neutral_y_m_12			18	1.92686	1.87449	#NULL!	1.90068	#VALUE!	#NULL!	controls (Minear & Park)	0	0	0	0	57
neutral_y_m_13			19	2.08549	2.11385	#NULL!	2.09967	#VALUE!	#NULL!	controls (Minear & Park)	0	0	1	0.5	58
neutral_y_m_14			20	2.10799	1.92278	#NULL!	2.01539	#VALUE!	#NULL!	controls (Minear & Park)	0	1	1	1	59
neutral_y_m_15			20	1.88307	1.85868	#NULL!	1.87087	#VALUE!	#NULL!	controls (Minear & Park)	0	1	1	1	60
neutral_y_m_16			20	1.79948	1.73553	#NULL!	1.76751	#VALUE!	#NULL!	controls (Minear & Park)	0	0	1	0.5	61
neutral_y_m_17			20	2.14051	2.10149	#NULL!	2.121	#VALUE!	#NULL!	controls (Minear & Park)	0	0	0	0	62
neutral_y_m_18			22	2	1.9632	#NULL!	1.9816	#VALUE!	#NULL!	controls (Minear & Park)	0	0	1	0.5	63
neutral_y_m_19			22	1.96548	1.90467	#NULL!	1.93508	#VALUE!	#NULL!	controls (Minear & Park)	0	0	1	0.5	64
neutral_y_m_2			19	1.83809	1.89182	#NULL!	1.86495	#VALUE!	#NULL!	controls (Minear & Park)	0	0	0	0	65
neutral_y_m_20			25	1.8212	1.7724	#NULL!	1.7968	#VALUE!	#NULL!	controls (Minear & Park)	0	0	0	0	66
neutral_y_m_21			25	1.88467	1.85979	#NULL!	1.87223	#VALUE!	#NULL!	controls (Minear & Park)	0	1	1	1	67
neutral_y_m_22			21	2.09667	2.08176	#NULL!	2.08922	#VALUE!	#NULL!	controls (Minear & Park)	0	0	0	0	68
neutral_y_m_23			22	1.8006	1.79502	#NULL!	1.79781	#VALUE!	#NULL!	controls (Minear & Park)	0	1	1	1	69
neutral_y_m_24			23	1.65969	1.626	#NULL!	1.64284	#VALUE!	#NULL!	controls (Minear & Park)	0	1	1	1	70
neutral_y_m_25			20	1.79776	1.86856	#NULL!	1.83316	#VALUE!	#NULL!	controls (Minear & Park)	0	0	0	0	71
neutral_y_m_26			20	2.01646	1.98827	#NULL!	2.00236	#VALUE!	#NULL!	controls (Minear & Park)	0	0	0	0	72
neutral_y_m_28			21	1.82559	1.81588	#NULL!	1.82074	#VALUE!	#NULL!	controls (Minear & Park)	0	0	0	0	73
neutral_y_m_29			21	1.83062	1.8616	#NULL!	1.84611	#VALUE!	#NULL!	controls (Minear & Park)	0	0	0	0	74
neutral_y_m_3			19	1.99708	1.95336	#NULL!	1.97522	#VALUE!	#NULL!	controls (Minear & Park)	0	1	1	1	75
neutral_y_m_31			21	1.74356	1.67474	#NULL!	1.70915	#VALUE!	#NULL!	controls (Minear & Park)	0	0	0	0	76
neutral_y_m_32			22	1.94539	1.86495	#NULL!	1.90517	#VALUE!	#NULL!	controls (Minear & Park)	0	0	1	0.5	77
neutral_y_m_33			22	1.7353	1.68764	#NULL!	1.71147	#VALUE!	#NULL!	controls (Minear & Park)	0	0	0	0	78
neutral_y_m_34			22	1.7736	1.73911	#NULL!	1.75636	#VALUE!	#NULL!	controls (Minear & Park)	0	0	1	0.5	79
neutral_y_m_35			23	2.04308	2.01204	#NULL!	2.02756	#VALUE!	#NULL!	controls (Minear & Park)	0	0	0	0	80
neutral_y_m_36			23	1.80636	1.783	#NULL!	1.79468	#VALUE!	#NULL!	controls (Minear & Park)	0	0	1	0.5	81
neutral_y_m_37			23	1.9582	1.90112	#NULL!	1.92966	#VALUE!	#NULL!	controls (Minear & Park)	0	0	0	0	82
neutral_y_m_38			23	1.84261	1.80438	#NULL!	1.82349	#VALUE!	#NULL!	controls (Minear & Park)	0	0	1	0.5	83
neutral_y_m_39			24	1.73064	1.75925	#NULL!	1.74495	#VALUE!	#NULL!	controls (Minear & Park)	0	0	0	0	84
neutral_y_m_4			20	1.86761	1.88662	#NULL!	1.87712	#VALUE!	#NULL!	controls (Minear & Park)	0	0	0	0	85
neutral_y_m_40			19	1.9178	1.91382	#NULL!	1.91581	#VALUE!	#NULL!	controls (Minear & Park)	0	1	1	1	86
neutral_y_m_5			21	1.84055	1.81704	#NULL!	1.82879	#VALUE!	#NULL!	controls (Minear & Park)	0	0	0	0	87
neutral_y_m_6			21	1.80883	1.76178	#NULL!	1.78531	#VALUE!	#NULL!	controls (Minear & Park)	0	0	0	0	88
neutral_y_m_7			22	1.83513	1.79008	#NULL!	1.81261	#VALUE!	#NULL!	controls (Minear & Park)	0	1	1	1	89
neutral_y_m_8			22	1.90792	1.87693	#NULL!	1.89243	#VALUE!	#NULL!	controls (Minear & Park)	0	0	0	0	90
neutral_y_m_9			23	1.98591	1.93444	#NULL!	1.96018	#VALUE!	#NULL!	controls (Minear & Park)	0	0	0	0	91
TMWmale26-2neutral			26	1.73807	1.69501	#NULL!	1.71654	#VALUE!	#NULL!	controls (Minear & Park)	0	0	0	0	22
TMWmale28-2neutral			28	1.97236	1.90723	#NULL!	1.9398	#VALUE!	#NULL!	controls (Minear & Park)	0	0	0	0	23
TMWmale29neutral			29	1.79277	1.78857	#NULL!	1.79067	#VALUE!	#NULL!	controls (Minear & Park)	0	0	0	0	24
TMWmale30neutral			30	1.73604	1.6755	#NULL!	1.70577	#VALUE!	#NULL!	controls (Minear & Park)	0	0	0	0	25
TMWmale32neutral			32	1.86395	1.76614	#NULL!	1.81504	#VALUE!	#NULL!	controls (Minear & Park)	0	0	1	0.5	26
TMWmale33-2neutral			33	1.63819	1.61593	#NULL!	1.62706	#VALUE!	#NULL!	controls (Minear & Park)	0	0	0	0	27
TMWmale34-2neutral			34	1.89781	1.87456	#NULL!	1.88618	#VALUE!	#NULL!	controls (Minear & Park)	0	1	0	0.5	28
TMWmale34-3neutral			34	1.8917	1.82404	#NULL!	1.85787	#VALUE!	#NULL!	controls (Minear & Park)	0	0	0	0	29
TMWmale34-4neutral			34	1.85361	1.79928	#NULL!	1.82645	#VALUE!	#NULL!	controls (Minear & Park)	0	0	0	0	30
TMWmale34neutral			34	1.75084	1.72234	#NULL!	1.73659	#VALUE!	#NULL!	controls (Minear & Park)	0	0	0	0	31
TMWmale37-2neutral			37	2.00809	1.90582	#NULL!	1.95696	#VALUE!	#NULL!	controls (Minear & Park)	0	1	1	1	32
TMWmale37neutral			37	1.83279	1.76746	#NULL!	1.80013	#VALUE!	#NULL!	controls (Minear & Park)	0	0	0	0	33
TMWmale41-2neutral			41	1.9037	1.89965	#NULL!	1.90168	#VALUE!	#NULL!	controls (Minear & Park)	0	0	0	0	34
TMWmale41neutral			41	1.77641	1.69813	#NULL!	1.73727	#VALUE!	#NULL!	controls (Minear & Park)	0	1	0	0.5	35
TMWmale45neutral			45	2.04874	1.93493	#NULL!	1.99184	#VALUE!	#NULL!	controls (Minear & Park)	0	0	1	0.5	36
TSFWmale23happy			23	1.79738	1.77093	#NULL!	1.78415	#VALUE!	#NULL!	controls (Minear & Park)	0	3	4	3.5	70
TSFWmale37neutral			37	1.8374	1.88561	#NULL!	1.86151	#VALUE!	#NULL!	controls (Minear & Park)	0	0	1	0.5	37
TSFWmale47neutral			47	1.75081	1.6765	#NULL!	1.71365	#VALUE!	#NULL!	controls (Minear & Park)	0	0	2	1	38
TSFWmale54happy			54	1.8329	1.80318	#NULL!	1.81804	#VALUE!	#NULL!	controls (Minear & Park)	0	3	4	3.5	39
TSFWmale54neutral			54	1.67268	1.62139	#NULL!	1.64704	#VALUE!	#NULL!	controls (Minear & Park)	0	1	1	1	39
TSFWmale61-2happy			61	1.7364	1.68976	#NULL!	1.71308	#VALUE!	#NULL!	controls (Minear & Park)	0	2	2	2	96
TSFWmale61happy			61	2.08494	2.04054	#NULL!	2.06274	#VALUE!	#NULL!	controls (Minear & Park)	0	3	2	2.5	97
TSFWmale63-2happy			63	1.86721	1.85561	#NULL!	1.86141	#VALUE!	#NULL!	controls (Minear & Park)	0	3	3	3	98
TSFWmale69happy			69	1.99993	1.93391	#NULL!	1.96692	#VALUE!	#NULL!	controls (Minear & Park)	0	3	3	3	99
TSFWmale70happy			70	1.88086	1.7791	#NULL!	1.82998	#VALUE!	#NULL!	controls (Minear & Park)	0	2	2	2	43
TSFWmale71-2happy			71	1.73494	1.68224	#NULL!	1.70859	#VALUE!	#NULL!	controls (Minear & Park)	0	1	1	1	44
TSFWmale71happy			71	1.73178	1.70116	#NULL!	1.71647	#VALUE!	#NULL!	controls (Minear & Park)	0	1	1	1	45
TSFWmale74happy			74	1.90028	1.74076	#NULL!	1.82052	#VALUE!	#NULL!	controls (Minear & Park)	0	1	1	1	100
TSFWmale79-2happy			79	1.82492	1.74028	#NULL!	1.7826	#VALUE!	#NULL!	controls (Minear & Park)	0	3	2	2.5	48
TSFWmale79-3happy			79	2.02962	1.96031	#NULL!	1.99496	#VALUE!	#NULL!	controls (Minear & Park)	0	4	3	3.5	49
TSFWmale79happy			79	1.90328	1.8028	#NULL!	1.85304	#VALUE!	#NULL!	controls (Minear & Park)	0	4	3	3.5	50
TSFWmale80happy			80	2.04487	2.06021	#NULL!	2.05254	#VALUE!	#NULL!	controls (Minear & Park)	0	4	4	4	101
TSFWmale87happy			87	1.89578	1.80056	#NULL!	1.84817	#VALUE!	#NULL!	controls (Minear & Park)	0	3	3	3	102
TSFWmale88happy			88	1.66588	1.62722	#NULL!	1.64655	#VALUE!	#NULL!	controls (Minear & Park)	0	2	3	2.5	51
Wmale_55-3neutral			55	1.99654	1.91953	#NULL!	1.95804	#VALUE!	#NULL!	controls (Minear & Park)	0	1	1	1	40
Wmale_55neutral			55	1.72824	1.63086	#NULL!	1.67955	#VALUE!	#NULL!	controls (Minear & Park)	0	0	0	0	41
12	Winterkorn	Martin	66	2.1648	2.09398	2.07868	2.12939	2.12174	2007	DAX	1	1	2	1.5
16	Teyssen	Johannes	54	2.26052	2.22826	2.24598	2.24439	2.25325	2010	DAX	1	3	2	2.5
21	Zetsche	Dieter	60	1.85034	1.85919	1.93347	1.85476	1.8919	2006	DAX	1	3	2	2.5
27	Diekmann	Michael	59	1.79145	1.78269	1.82194	1.78707	1.8067	2003	DAX	1	0	1	0.5
45	Löscher	Peter	56	1.8615	1.82891	1.7968	1.8452	1.82915	2007	DAX	1	0	0	0
64	Appel	Frank	52	1.84902	1.72469	1.78697	1.78685	1.81799	2008	DAX	1	1	1	1
83	Blessing	Martin	50	1.85991	1.87316	1.90728	1.86654	1.88359	2009	DAX	1	0	0	0
84	Bock	Kurt W.	55	1.95656	1.86938	1.94054	1.91297	1.94855	2011	DAX	1	1	1	1
101	Hainer	Herbert	58	1.86994	2.0099	1.99822	1.93992	1.93408	2001	DAX	1	2	2	2
102	Dekkers	Marijn	56	1.75194	1.74443	1.72426	1.74819	1.7381	2010	DAX	1	1	1	1
103	Heidenreich	Stefan	50	2.03048	1.94046	2.01535	1.98547	2.02291	2012	DAX	1	2	1	1.5
104	Reithofer	Norbert	57	2.11484	2.13096	2.14449	2.1229	2.12967	2006	DAX	1	2	1	1.5
105	Degenhart	Elmar	54	1.90488	1.99686	1.90053	1.95087	1.90271	2009	DAX	1	3	2	2.5
107	Fitschen	Jürgen	65	1.91749	1.95042	1.95892	1.93396	1.93821	2012	DAX	1	2	1	1.5
108	Francioni	Reto	58	1.85286	1.81062	1.80793	1.83174	1.8304	2005	DAX	1	1	1	1
109	Franz	Christoph	53	1.92232	1.91781	1.92566	1.92006	1.92399	2011	DAX	1	2	2	2
110	Obermann	Rene	50	1.75085	1.76098	1.7095	1.75591	1.73017	2006	DAX	1	1	1	1
111	Schneider	Ulf	48	1.89928	1.84414	1.92748	1.87171	1.91338	2003	DAX	1	3	3	3
112	Lipps	Benjamin	73	1.65994	1.57414	1.6873	1.61704	1.67362	1999	DAX	1	3	3	3
113	Scheifele	Bernd	55	1.81482	1.80976	1.9002	1.81228	1.85751	2005	DAX	1	1	2	1.5
114	Rorsted	Kasper	51	1.78405	1.8324	1.83571	1.80822	1.80988	2008	DAX	1	0	1	0.5
115	Ploss	Reinhard	58	1.84589	1.68561	1.76266	1.76575	1.80428	2012	DAX	1	1	0	0.5
116	Steiner	Norbert	59	1.79756	1.98916	1.94603	1.89336	1.8718	2007	DAX	1	2	1	1.5
117	Retzle	Wolfgang	64	2.00608	1.81625	1.71889	1.91116	1.86249	2003	DAX	1	0	0	0
118	Heitmann	Axel C.	54	1.72395	1.92037	1.9019	1.82216	1.81292	2004	DAX	1	1	2	1.5
120	von Bomhard	Nikolaus	57	1.89194	1.92369	1.94824	1.90782	1.92009	2004	DAX	1	2	1	1.5
121	Terium	Peter	50	2.00789	2.00508	2.02844	2.00648	2.01816	2012	DAX	1	0	0	0
122	McDermott	Bill	52	1.71461	1.6395	1.68153	1.67705	1.69807	2010	DAX	1	2	1	1.5
123	Snabe	Jim Hagemann	48	2.02556	2.01945	1.91415	2.0225	1.96985	2010	DAX	1	3	2	2.5
124	Hiesinger	Heinrich	53	2.21568	2.14104	2.23225	2.17836	2.22397	2011	DAX	1	3	2	2.5
501	Kley	Karl-Ludwig	62	1.95262	1.83803	1.89967	1.8953	1.92614	2007	DAX	1	1	1	1
2	Tillerson	Rex W.	61	1.91071	1.83826	1.87854	1.87449	1.89463	2006	Dow Jones	2	2	1	1.5		440	47.1	452926000000	213400000	3.5	0.9	388	209
3	Duke	Michael T.	64	1.99466	1.9719	2.10302	1.98328	2.04884	2009	Dow Jones	2	3	2	2.5		87	68	446950000000	311600000
8	Watson	John S.	57	2.12044	2.10799	2.14742	2.11422	2.13393	2010	Dow Jones	2	1	0	0.5		409	49.9	245621000000	262400000	3.9	0.95	561	288
22	Immelt	Jeffrey R.	57	1.98021	1.95177	1.95678	1.96599	1.96849	2000	Dow Jones	2	3	2	2.5		161	63.4	147616000000	161500000	3.6	0.82	1826	854
30	Stephenson	Randall L.	53	1.85394	1.73011	1.77921	1.79202	1.81657	2007	Dow Jones	2	0	1	0.5		81	69.9	126723000000	95500000	3	0.55	4853	2184
44	Moynihan	Brian T.	54	2.16933	2.17242	2.20509	2.17088	2.18721	2010	Dow Jones	2	3	2	2.5		79	69.9	115074000000	186800000	3.2	0.73	5672	2335
48	McAdam	Lowell C.	59	1.84027	1.90031	1.90841	1.87029	1.87434	2011	Dow Jones	2	0	1	0.5				110875000000	56400000	3.1	0.59	2098	678
49	Dimon	James	57	1.77399	1.90336	1.72091	1.83867	1.74745	2005	Dow Jones	2	0	0	0		206	61.2	110838000000	183500000	3.4	0.82	3721	771
70	Ballmer	Steven A.	57	1.89853	1.91868	2.01656	1.90861	1.95755	2000	Dow Jones	2	2	2	2		47	73.5	69943000000	99700000
81	Blake	Francis S.	64	1.789	1.7445	1.85737	1.76675	1.82319	2007	Dow Jones	2	1	1	1		92	68.7	70395000000	38000000	3.2	0.81	4113	2646
97	Chambers	John T.	64	1.86583	1.81536	1.82142	1.8406	1.84363	1995	Dow Jones	2	1	1	1		59	72.1	43218000000	44900000	3.4	0.56	4319	3108
130	Chênevert	Louis R.	55	1.90871	1.86702	1.9716	1.88787	1.94016	2006	Dow Jones	2	3	3	3		212	61	NaN	NaN	3.2	0.74	165	78
172	Fishman	Jay S.	59	2.04226	1.92111	2.02804	1.98169	2.03515	2001	Dow Jones	2	2	2	2		139	65.2	25446000000	17200000	3.3	0.8	583	386
189	Gorsky	Alex	53	2.00016	1.90939	1.99457	1.95478	1.99736	2012	Dow Jones	2	3	3	3				NaN	NaN	3.6	0.88	1232	311
200	Hemsley	Stephen J.	61	1.84093	1.80203	1.81946	1.82148	1.8302	2006	Dow Jones	2	0	0	0		311	56	101862000000	60300000	2.8	0.61	1659	658
220	Iger	Robert A.	62	2.07166	2.02847	2.09086	2.05006	2.08126	2005	Dow Jones	2	2	2	2		87	69	NaN	NaN	3.7	0.89	609	392
246	Kent	Muhtar	61	1.77296	1.74546	1.7706	1.75921	1.77178	2008	Dow Jones	2	0	0	0		275	58.1	46542000000	96600000	3.1	0.63	1137	245
254	Kleinfeld	Klaus	56	1.82563	1.77846	1.8	1.80204	1.81282	2008	Dow Jones	2	2	2	2		447	46.5	24951000000	40400000	3	0.56	162	87
303	McDonald	Robert A.	60	1.83443	1.82261	1.83879	1.82852	1.83661	2009	Dow Jones	2	1	1	1		265	58.5	82559000000	53000000
305	McNerney	W. James Jr.	64	1.99983	1.91109	1.99983	1.95546	1.99983	2005	Dow Jones	2	1	1	1		106	67.3	NaN	NaN	3.5	0.76	1753	744
336	Oberhelman	Douglas R.	61	1.62544	1.61924	1.64497	1.62234	1.6352	2010	Dow Jones	2	0	0	0		362	53	60138000000	60000000	3.5	0.78	723	370
345	Otellini	Paul S.	63	2.01185	1.98797	2.01357	1.99991	2.01271	2005	Dow Jones	2	3	1	2		35	75.2	53999000000	104900000	3.8	0.82	3355	527
369	Read	Ian C.	60	2.14114	2.1741	2.15971	2.15762	2.15043	2010	Dow Jones	2	2	1	1.5		91	68.7	67932000000	60700000	3.3	0.64	1019	343
497	Thulin	Inge G.	60	2.04796	1.93951	1.98117	1.99373	2.01457	2012	Dow Jones	2	2	2	2				NaN	NaN	3.5	0.91	499	145
9910	Pius XII		#NULL!	1.70286	1.63796	1.70561	1.67045	1.70424	#NULL!	Popes	3	0	0	0
9991	Benedikt XVI		#NULL!	2.16175	2.03697	2.25528	2.09935	2.20851	#NULL!	Popes	3	1	1	1
9992	Franziskus		#NULL!	1.7463	1.73265	1.74277	1.73945	1.74454	#NULL!	Popes	3	0	0	0
9993	Johannes Paul I		#NULL!	1.81813	1.71978	1.81032	1.76895	1.81422	#NULL!	Popes	3	2	1	1.5
9994	Johannes Paul II		#NULL!	2.05037	2.02384	2.06704	2.0371	2.0587	#NULL!	Popes	3	2	1	1.5
9995	Johannes XXIII		#NULL!	2.05721	2.00863	2.14643	2.0329	2.10182	#NULL!	Popes	3	0	1	0.5
9996	Paul VI		#NULL!	2.04605	1.89772	2.08313	1.9719	2.06459	#NULL!	Popes	3	1	2	1.5
9997	Pius XI		#NULL!	1.91822	1.88069	1.97203	1.89945	1.94513	#NULL!	Popes	3	0	0	0
9998	Pius IX		#NULL!	2.0726	1.93185	2.07855	2.00225	2.07558	#NULL!	Popes	3	1	1	1
1002			#NULL!	1.77889	#NULL!	1.66339	#VALUE!	1.72114	#NULL!	NGOs	4	2	2	2
1005			#NULL!	1.73555	#NULL!	1.62051	#VALUE!	1.67803	#NULL!	NGOs	4	3	2	2.5
1006			#NULL!	1.713	#NULL!	1.72823	#VALUE!	1.72061	#NULL!	NGOs	4	2	2	2
1008			#NULL!	1.78191	#NULL!	1.73788	#VALUE!	1.7599	#NULL!	NGOs	4	2	2	2
1010			#NULL!	1.81897	#NULL!	1.76041	#VALUE!	1.78969	#NULL!	NGOs	4	0	0	0
1012			#NULL!	1.84886	#NULL!	1.77686	#VALUE!	1.81286	#NULL!	NGOs	4	0	0	0
1014			#NULL!	1.96817	#NULL!	1.97308	#VALUE!	1.97063	#NULL!	NGOs	4	1	1	1
1017			#NULL!	2.14473	#NULL!	2.1638	#VALUE!	2.15426	#NULL!	NGOs	4	1	1	1
1020			#NULL!	1.73772	#NULL!	1.7292	#VALUE!	1.73346	#NULL!	NGOs	4	1	0	0.5
1023			#NULL!	2.0325	#NULL!	2.10293	#VALUE!	2.06771	#NULL!	NGOs	4	4	2	3
1024			#NULL!	1.98217	#NULL!	1.95758	#VALUE!	1.96988	#NULL!	NGOs	4	3	2	2.5
1028			#NULL!	2.12163	#NULL!	2.16704	#VALUE!	2.14434	#NULL!	NGOs	4	2	2	2
1030			#NULL!	1.989	#NULL!	2.03803	#VALUE!	2.01352	#NULL!	NGOs	4	1	1	1
1031			#NULL!	1.88073	#NULL!	1.93979	#VALUE!	1.91026	#NULL!	NGOs	4	3	3	3
1034			#NULL!	2.21906	#NULL!	2.17112	#VALUE!	2.19509	#NULL!	NGOs	4	1	1	1
1036			#NULL!	2.05037	#NULL!	2.11015	#VALUE!	2.08026	#NULL!	NGOs	4	4	3	3.5
1037			#NULL!	2.12923	#NULL!	2.16477	#VALUE!	2.147	#NULL!	NGOs	4	3	2	2.5
1043			#NULL!	1.78082	#NULL!	1.71243	#VALUE!	1.74662	#NULL!	NGOs	4	0	0	0
1044			#NULL!	2.17105	#NULL!	2.14139	#VALUE!	2.15622	#NULL!	NGOs	4	2	1	1.5
1046			#NULL!	1.93629	#NULL!	1.91583	#VALUE!	1.92606	#NULL!	NGOs	4	2	1	1.5
1052			#NULL!	1.85833	#NULL!	1.80225	#VALUE!	1.83029	#NULL!	NGOs	4	3	2	2.5
1057			#NULL!	1.85141	#NULL!	1.80986	#VALUE!	1.83063	#NULL!	NGOs	4	2	0	1
1063			#NULL!	1.96573	#NULL!	1.96418	#VALUE!	1.96495	#NULL!	NGOs	4	2	1	1.5
1066			50	1.99446	#NULL!	1.99081	#VALUE!	1.99263	#NULL!	NGOs	4	3	3	3
1067			53	1.91845	#NULL!	1.83229	#VALUE!	1.87537	#NULL!	NGOs	4	2	1	1.5
1071			57	1.80227	#NULL!	1.78126	#VALUE!	1.79177	#NULL!	NGOs	4	0	0	0
1072			45	2.11572	#NULL!	2.03789	#VALUE!	2.0768	#NULL!	NGOs	4	2	2	2
1073			#NULL!	1.79003	#NULL!	1.77131	#VALUE!	1.78067	#NULL!	NGOs	4	1	1	1
1075			#NULL!	1.98741	#NULL!	1.94916	#VALUE!	1.96829	#NULL!	NGOs	4	1	1	1
1077			73	1.90348	#NULL!	1.92162	#VALUE!	1.91255	#NULL!	NGOs	4	0	0	0
1078			#NULL!	2.01365	#NULL!	2.02634	#VALUE!	2.01999	#NULL!	NGOs	4	1	1	1
1079			63	1.82117	#NULL!	1.85631	#VALUE!	1.83874	#NULL!	NGOs	4	0	0	0
1082			#NULL!	1.81852	#NULL!	1.91526	#VALUE!	1.86689	#NULL!	NGOs	4	2	2	2
1087			#NULL!	2.11013	#NULL!	2.10325	#VALUE!	2.10669	#NULL!	NGOs	4	2	2	2
1089			27	1.84826	#NULL!	1.85812	#VALUE!	1.85319	#NULL!	NGOs	4	2	1	1.5
1094			#NULL!	2.04268	#NULL!	2.03029	#VALUE!	2.03648	#NULL!	NGOs	4	3	1	2
1097			52	1.91561	#NULL!	1.9121	#VALUE!	1.91386	#NULL!	NGOs	4	1	1	1
1098			61	2.00543	#NULL!	1.92903	#VALUE!	1.96723	#NULL!	NGOs	4	2	1	1.5
adrian1			#NULL!	1.61932	#NULL!	1.67243	#NULL!	1.64587	#NULL!	controls (all databases)	5
alec1			#NULL!	1.75881	#NULL!	1.67284	#NULL!	1.71583	#NULL!	controls (all databases)	5
alister1			#NULL!	1.83903	#NULL!	1.85217	#NULL!	1.8456	#NULL!	controls (all databases)	5
amellanb			#NULL!	1.84589	#NULL!	1.86162	#NULL!	1.85376	#NULL!	controls (all databases)	5
andrew2			#NULL!	1.78084	#NULL!	1.76823	#NULL!	1.77453	#NULL!	controls (all databases)	5
barry17			#NULL!	1.62881	#NULL!	1.69221	#NULL!	1.66051	#NULL!	controls (all databases)	5
bfegan17			#NULL!	1.80899	#NULL!	1.84572	#NULL!	1.82736	#NULL!	controls (all databases)	5
blair1			#NULL!	#NULL!	#NULL!	1.85918	#NULL!	#VALUE!	#NULL!	controls (all databases)	5
chris_ha			#NULL!	1.72373	#NULL!	1.74081	#NULL!	1.73227	#NULL!	controls (all databases)	5
chris_pi			#NULL!	1.74978	#NULL!	1.81697	#NULL!	1.78338	#NULL!	controls (all databases)	5
chris2			#NULL!	1.73395	#NULL!	1.70005	#NULL!	1.717	#NULL!	controls (all databases)	5
dave_faq			#NULL!	1.85003	#NULL!	1.84963	#NULL!	1.84983	#NULL!	controls (all databases)	5
david_im			#NULL!	1.8774	#NULL!	1.8766	#NULL!	1.877	#NULL!	controls (all databases)	5
david18			#NULL!	1.80681	#NULL!	1.86291	#NULL!	1.83486	#NULL!	controls (all databases)	5
dbell2			#NULL!	1.76405	#NULL!	1.76004	#NULL!	1.76204	#NULL!	controls (all databases)	5
derek2			#NULL!	1.65352	#NULL!	1.7724	#NULL!	1.71296	#NULL!	controls (all databases)	5
dhands1			#NULL!	1.84442	#NULL!	1.8426	#NULL!	1.84351	#NULL!	controls (all databases)	5
dhawley2			#NULL!	1.89381	#NULL!	1.87037	#NULL!	1.88209	#NULL!	controls (all databases)	5
dlow11			#NULL!	1.78024	#NULL!	1.82227	#NULL!	1.80126	#NULL!	controls (all databases)	5
dougal_g			#NULL!	1.74787	#NULL!	1.78373	#NULL!	1.7658	#NULL!	controls (all databases)	5
dpearson			#NULL!	1.66076	#NULL!	1.69017	#NULL!	1.67546	#NULL!	controls (all databases)	5
dsmith1			#NULL!	1.71858	#NULL!	1.77109	#NULL!	1.74484	#NULL!	controls (all databases)	5
george1			#NULL!	1.71515	#NULL!	1.74466	#NULL!	1.7299	#NULL!	controls (all databases)	5
gfindley			#NULL!	1.92234	#NULL!	1.93546	#NULL!	1.9289	#NULL!	controls (all databases)	5
ghall2			#NULL!	1.5529	#NULL!	1.47039	#NULL!	1.51164	#NULL!	controls (all databases)	5
gordon3			#NULL!	1.88292	#NULL!	1.88867	#NULL!	1.88579	#NULL!	controls (all databases)	5
graeme2			#NULL!	#NULL!	#NULL!	2.10301	#NULL!	#VALUE!	#NULL!	controls (all databases)	5
graham_b			#NULL!	1.87734	#NULL!	1.8824	#NULL!	1.87987	#NULL!	controls (all databases)	5
grant_cu			#NULL!	1.73748	#NULL!	1.69867	#NULL!	1.71808	#NULL!	controls (all databases)	5
hack			#NULL!	1.89115	#NULL!	1.88245	#NULL!	1.8868	#NULL!	controls (all databases)	5
ian1			#NULL!	1.97029	#NULL!	1.98373	#NULL!	1.97701	#NULL!	controls (all databases)	5
iroy2			#NULL!	1.74044	#NULL!	1.73934	#NULL!	1.73989	#NULL!	controls (all databases)	5
itaylor3			#NULL!	1.76173	#NULL!	1.7293	#NULL!	1.74551	#NULL!	controls (all databases)	5
jim7			#NULL!	1.61931	#NULL!	1.60203	#NULL!	1.61067	#NULL!	controls (all databases)	5
johannes			#NULL!	1.95176	#NULL!	2.03392	#NULL!	1.99284	#NULL!	controls (all databases)	5
john_mcc			#NULL!	1.87769	#NULL!	1.90471	#NULL!	1.8912	#NULL!	controls (all databases)	5
john_tho			#NULL!	1.70446	#NULL!	1.66764	#NULL!	1.68605	#NULL!	controls (all databases)	5
johnny_p			#NULL!	1.92037	#NULL!	1.93568	#NULL!	1.92802	#NULL!	controls (all databases)	5
jsheenan			#NULL!	#NULL!	#NULL!	1.80422	#NULL!	#VALUE!	#NULL!	controls (all databases)	5
mark2			#NULL!	1.98915	#NULL!	2.04886	#NULL!	2.01901	#NULL!	controls (all databases)	5
martin1			#NULL!	1.7489	#NULL!	1.73514	#NULL!	1.74202	#NULL!	controls (all databases)	5
michael1			#NULL!	1.78098	#NULL!	1.78105	#NULL!	1.78101	#NULL!	controls (all databases)	5
mmanson6			#NULL!	1.74659	#NULL!	1.73579	#NULL!	1.74119	#NULL!	controls (all databases)	5
mnichols			#NULL!	1.9779	#NULL!	1.97912	#NULL!	1.97851	#NULL!	controls (all databases)	5
neil1			#NULL!	1.63912	#NULL!	1.69407	#NULL!	1.66659	#NULL!	controls (all databases)	5
nick5			#NULL!	1.81589	#NULL!	1.87305	#NULL!	1.84447	#NULL!	controls (all databases)	5
paul2			#NULL!	1.80244	#NULL!	1.82866	#NULL!	1.81555	#NULL!	controls (all databases)	5
peter_ma			#NULL!	#NULL!	#NULL!	1.88183	#NULL!	#VALUE!	#NULL!	controls (all databases)	5
peter6			#NULL!	1.90279	#NULL!	1.89682	#NULL!	1.8998	#NULL!	controls (all databases)	5
richard_			#NULL!	1.841	#NULL!	1.69921	#NULL!	1.77011	#NULL!	controls (all databases)	5
scott1			#NULL!	1.64194	#NULL!	1.71446	#NULL!	1.6782	#NULL!	controls (all databases)	5
simon12			#NULL!	1.7556	#NULL!	1.80076	#NULL!	1.77818	#NULL!	controls (all databases)	5
stephen1			#NULL!	1.87305	#NULL!	1.93114	#NULL!	1.90209	#NULL!	controls (all databases)	5
stewart1			#NULL!	1.89354	#NULL!	1.89993	#NULL!	1.89673	#NULL!	controls (all databases)	5
terry_jo			#NULL!	1.8542	#NULL!	1.91268	#NULL!	1.88344	#NULL!	controls (all databases)	5
tock12			#NULL!	1.86562	#NULL!	1.87099	#NULL!	1.86831	#NULL!	controls (all databases)	5
trevor15			#NULL!	2.00476	#NULL!	2.03629	#NULL!	2.02053	#NULL!	controls (all databases)	5
00032_hv			#NULL!	1.92168	#NULL!	1.90248	#NULL!	1.91208	#NULL!	controls (all databases)	6
00034_hv			#NULL!	1.7714	#NULL!	1.74839	#NULL!	1.7599	#NULL!	controls (all databases)	6
00057_hv			#NULL!	2.0976	#NULL!	2.10636	#NULL!	2.10198	#NULL!	controls (all databases)	6
00064_hv			#NULL!	1.92606	#NULL!	2.02108	#NULL!	1.97357	#NULL!	controls (all databases)	6
00071_hv			#NULL!	1.8171	#NULL!	1.76791	#NULL!	1.7925	#NULL!	controls (all databases)	6
00072_hv			#NULL!	1.86605	#NULL!	1.81546	#NULL!	1.84076	#NULL!	controls (all databases)	6
00084_hv			#NULL!	1.71389	#NULL!	1.73221	#NULL!	1.72305	#NULL!	controls (all databases)	6
00085_hv			#NULL!	2.00246	#NULL!	2.00269	#NULL!	2.00257	#NULL!	controls (all databases)	6
00088_hv			#NULL!	1.84075	#NULL!	1.83804	#NULL!	1.8394	#NULL!	controls (all databases)	6
00092_hv			#NULL!	1.94866	#NULL!	1.95681	#NULL!	1.95274	#NULL!	controls (all databases)	6
00104_hv			#NULL!	1.94652	#NULL!	1.976	#NULL!	1.96126	#NULL!	controls (all databases)	6
00105_hv			#NULL!	1.80777	#NULL!	1.8294	#NULL!	1.81858	#NULL!	controls (all databases)	6
00110_hv			#NULL!	1.94154	#NULL!	1.92603	#NULL!	1.93378	#NULL!	controls (all databases)	6
00111_hv			#NULL!	1.68874	#NULL!	1.71074	#NULL!	1.69974	#NULL!	controls (all databases)	6
00112_hv			#NULL!	1.91416	#NULL!	1.91123	#NULL!	1.91269	#NULL!	controls (all databases)	6
00116_hv			#NULL!	2.0377	#NULL!	2.08155	#NULL!	2.05963	#NULL!	controls (all databases)	6
00121_hv			#NULL!	1.89664	#NULL!	1.81841	#NULL!	1.85752	#NULL!	controls (all databases)	6
00133_hv			#NULL!	2.07029	#NULL!	2.19593	#NULL!	2.13311	#NULL!	controls (all databases)	6
00151_hv			#NULL!	1.86503	#NULL!	1.88037	#NULL!	1.8727	#NULL!	controls (all databases)	6
00163_hv			#NULL!	1.92471	#NULL!	1.91661	#NULL!	1.92066	#NULL!	controls (all databases)	6
00165_hv			#NULL!	1.76974	#NULL!	1.76705	#NULL!	1.7684	#NULL!	controls (all databases)	6
00177_hv			#NULL!	1.73525	#NULL!	1.7018	#NULL!	1.71853	#NULL!	controls (all databases)	6
BioID_00			#NULL!	1.82364	#NULL!	1.85011	#NULL!	1.83687	#NULL!	controls (all databases)	7
BioID_00			#NULL!	1.63011	#NULL!	1.56564	#NULL!	1.59788	#NULL!	controls (all databases)	7
BioID_01			#NULL!	1.66004	#NULL!	1.65217	#NULL!	1.65611	#NULL!	controls (all databases)	7
BioID_01			#NULL!	#NULL!	#NULL!	1.90725	#NULL!	#VALUE!	#NULL!	controls (all databases)	7
BioID_01			#NULL!	1.85522	#NULL!	1.95344	#NULL!	1.90433	#NULL!	controls (all databases)	7
BioID_01			#NULL!	1.82442	#NULL!	1.89512	#NULL!	1.85977	#NULL!	controls (all databases)	7
BioID_03			#NULL!	1.71299	#NULL!	1.65423	#NULL!	1.68361	#NULL!	controls (all databases)	7
BioID_03			#NULL!	1.57146	#NULL!	1.62001	#NULL!	1.59574	#NULL!	controls (all databases)	7
BioID_06			#NULL!	1.75716	#NULL!	1.77972	#NULL!	1.76844	#NULL!	controls (all databases)	7
BioID_06			#NULL!	1.67582	#NULL!	1.65636	#NULL!	1.66609	#NULL!	controls (all databases)	7
BioID_06			#NULL!	1.46733	#NULL!	1.44855	#NULL!	1.45794	#NULL!	controls (all databases)	7
BioID_08			#NULL!	1.78265	#NULL!	1.9089	#NULL!	1.84577	#NULL!	controls (all databases)	7
BioID_08			#NULL!	1.69327	#NULL!	1.71999	#NULL!	1.70663	#NULL!	controls (all databases)	7
BioID_10			#NULL!	1.71018	#NULL!	1.68569	#NULL!	1.69793	#NULL!	controls (all databases)	7
S037			#NULL!	1.80447	#NULL!	1.83058	#NULL!	1.81752	#NULL!	controls (all databases)	8
S044			#NULL!	1.92687	#NULL!	1.94177	#NULL!	1.93432	#NULL!	controls (all databases)	8
S045			#NULL!	1.99128	#NULL!	2.03152	#NULL!	2.0114	#NULL!	controls (all databases)	8
S050			#NULL!	2.11027	#NULL!	2.09095	#NULL!	2.10061	#NULL!	controls (all databases)	8
S053			#NULL!	#NULL!	#NULL!	2.08399	#NULL!	#VALUE!	#NULL!	controls (all databases)	8
S054			#NULL!	2.01314	#NULL!	2.12549	#NULL!	2.06932	#NULL!	controls (all databases)	8
S056			#NULL!	1.68289	#NULL!	1.70542	#NULL!	1.69416	#NULL!	controls (all databases)	8
S058			#NULL!	1.96949	#NULL!	1.98049	#NULL!	1.97499	#NULL!	controls (all databases)	8
S062			#NULL!	2.14337	#NULL!	2.16881	#NULL!	2.15609	#NULL!	controls (all databases)	8
S063			#NULL!	#NULL!	#NULL!	2.11027	#NULL!	#VALUE!	#NULL!	controls (all databases)	8
S064			#NULL!	1.80245	#NULL!	1.80122	#NULL!	1.80184	#NULL!	controls (all databases)	8
S073			#NULL!	1.79097	#NULL!	1.79667	#NULL!	1.79382	#NULL!	controls (all databases)	8
S075			#NULL!	1.94484	#NULL!	1.95275	#NULL!	1.9488	#NULL!	controls (all databases)	8
S081			#NULL!	1.84077	#NULL!	1.83559	#NULL!	1.83818	#NULL!	controls (all databases)	8
S082			#NULL!	1.94284	#NULL!	1.93847	#NULL!	1.94065	#NULL!	controls (all databases)	8
S088			#NULL!	1.99414	#NULL!	2.1067	#NULL!	2.05042	#NULL!	controls (all databases)	8
S089			#NULL!	1.75917	#NULL!	1.73405	#NULL!	1.74661	#NULL!	controls (all databases)	8
S092			#NULL!	1.81065	#NULL!	1.80077	#NULL!	1.80571	#NULL!	controls (all databases)	8
S093			#NULL!	1.9527	#NULL!	1.99787	#NULL!	1.97529	#NULL!	controls (all databases)	8
S096			#NULL!	2.06155	#NULL!	2.05669	#NULL!	2.05912	#NULL!	controls (all databases)	8
S097			#NULL!	1.75385	#NULL!	1.78306	#NULL!	1.76846	#NULL!	controls (all databases)	8
S099			#NULL!	2.06906	#NULL!	2.11291	#NULL!	2.09098	#NULL!	controls (all databases)	8
S101			#NULL!	1.74165	#NULL!	1.75401	#NULL!	1.74783	#NULL!	controls (all databases)	8
S107			#NULL!	2.16097	#NULL!	2.08954	#NULL!	2.12526	#NULL!	controls (all databases)	8
S113			#NULL!	1.91428	#NULL!	1.95307	#NULL!	1.93368	#NULL!	controls (all databases)	8
S116			#NULL!	1.95159	#NULL!	1.9161	#NULL!	1.93385	#NULL!	controls (all databases)	8
S118			#NULL!	1.99553	#NULL!	2.00605	#NULL!	2.00079	#NULL!	controls (all databases)	8
S119			#NULL!	1.91219	#NULL!	1.87179	#NULL!	1.89199	#NULL!	controls (all databases)	8
S120			#NULL!	#NULL!	#NULL!	1.76	#NULL!	#VALUE!	#NULL!	controls (all databases)	8
S126			#NULL!	1.84746	#NULL!	1.92265	#NULL!	1.88505	#NULL!	controls (all databases)	8
S131			#NULL!	2.00276	#NULL!	2.01977	#NULL!	2.01127	#NULL!	controls (all databases)	8
S132			#NULL!	2.11935	#NULL!	2.13256	#NULL!	2.12595	#NULL!	controls (all databases)	8
S134			#NULL!	#NULL!	#NULL!	2.02446	#NULL!	#VALUE!	#NULL!	controls (all databases)	8
S135			#NULL!	1.71914	#NULL!	1.72417	#NULL!	1.72166	#NULL!	controls (all databases)	8
S506			#NULL!	2.0747	#NULL!	2.06657	#NULL!	2.07063	#NULL!	controls (all databases)	8
MVC-003F			#NULL!	1.84063	#NULL!	1.90216	#NULL!	1.87139	#NULL!	controls (all databases)	9
MVC-003F			#NULL!	1.72125	#NULL!	1.75615	#NULL!	1.7387	#NULL!	controls (all databases)	9
MVC-003F			#NULL!	1.84034	#NULL!	1.86459	#NULL!	1.85247	#NULL!	controls (all databases)	9
MVC-003F			#NULL!	1.91415	#NULL!	1.93979	#NULL!	1.92697	#NULL!	controls (all databases)	9
MVC-003F			#NULL!	1.65557	#NULL!	1.70219	#NULL!	1.67888	#NULL!	controls (all databases)	9
MVC-003F			#NULL!	1.87968	#NULL!	1.9179	#NULL!	1.89879	#NULL!	controls (all databases)	9
MVC-003F			#NULL!	1.81475	#NULL!	1.81234	#NULL!	1.81355	#NULL!	controls (all databases)	9
MVC-003F			#NULL!	1.87107	#NULL!	1.86902	#NULL!	1.87005	#NULL!	controls (all databases)	9
MVC-003F			#NULL!	1.8681	#NULL!	1.85223	#NULL!	1.86016	#NULL!	controls (all databases)	9
MVC-003F			#NULL!	1.77881	#NULL!	1.83314	#NULL!	1.80597	#NULL!	controls (all databases)	9
MVC-003F			#NULL!	2.12874	#NULL!	2.17519	#NULL!	2.15196	#NULL!	controls (all databases)	9
MVC-003F			#NULL!	1.99647	#NULL!	2.04111	#NULL!	2.01879	#NULL!	controls (all databases)	9
MVC-003F			#NULL!	2.20033	#NULL!	2.187	#NULL!	2.19366	#NULL!	controls (all databases)	9
MVC-003F			#NULL!	#NULL!	#NULL!	1.76971	#NULL!	#VALUE!	#NULL!	controls (all databases)	9
MVC-003F			#NULL!	1.83315	#NULL!	1.87834	#NULL!	1.85575	#NULL!	controls (all databases)	9
MVC-003F			#NULL!	1.84717	#NULL!	1.89768	#NULL!	1.87242	#NULL!	controls (all databases)	9
MVC-003F			#NULL!	2.17581	#NULL!	2.13003	#NULL!	2.15292	#NULL!	controls (all databases)	9
MVC-003F			#NULL!	2.00972	#NULL!	2.0039	#NULL!	2.00681	#NULL!	controls (all databases)	9
MVC-003F			#NULL!	1.86543	#NULL!	1.92427	#NULL!	1.89485	#NULL!	controls (all databases)	9
MVC-003F			#NULL!	2.11431	#NULL!	2.21833	#NULL!	2.16632	#NULL!	controls (all databases)	9
MVC-003F			#NULL!	1.93327	#NULL!	1.9376	#NULL!	1.93544	#NULL!	controls (all databases)	9
MVC-003F			#NULL!	2.03613	#NULL!	2.03222	#NULL!	2.03417	#NULL!	controls (all databases)	9
MVC-003F			#NULL!	1.90014	#NULL!	1.95034	#NULL!	1.92524	#NULL!	controls (all databases)	9
MVC-003F			#NULL!	1.96211	#NULL!	2.00798	#NULL!	1.98505	#NULL!	controls (all databases)	9
MVC-003F			#NULL!	1.84176	#NULL!	1.91129	#NULL!	1.87653	#NULL!	controls (all databases)	9
MVC-003F			#NULL!	1.85155	#NULL!	1.83476	#NULL!	1.84315	#NULL!	controls (all databases)	9
MVC-003F			#NULL!	1.97019	#NULL!	2.00225	#NULL!	1.98622	#NULL!	controls (all databases)	9
MVC-003F			#NULL!	1.85769	#NULL!	1.8661	#NULL!	1.8619	#NULL!	controls (all databases)	9
MVC-003F			#NULL!	2.09949	#NULL!	2.08198	#NULL!	2.09074	#NULL!	controls (all databases)	9
MVC-003F			#NULL!	1.92375	#NULL!	1.91358	#NULL!	1.91867	#NULL!	controls (all databases)	9
MVC-003F			#NULL!	1.89411	#NULL!	1.88599	#NULL!	1.89005	#NULL!	controls (all databases)	9
MVC-003F			#NULL!	2.01954	#NULL!	2.04522	#NULL!	2.03238	#NULL!	controls (all databases)	9
MVC-003F			#NULL!	1.69839	#NULL!	1.70104	#NULL!	1.69972	#NULL!	controls (all databases)	9
MVC-003F			#NULL!	1.77749	#NULL!	1.835	#NULL!	1.80625	#NULL!	controls (all databases)	9
MVC-003F			#NULL!	1.91151	#NULL!	1.92944	#NULL!	1.92048	#NULL!	controls (all databases)	9
MVC-003F			#NULL!	1.77361	#NULL!	1.75557	#NULL!	1.76459	#NULL!	controls (all databases)	9
MVC-003F			#NULL!	1.76368	#NULL!	1.7546	#NULL!	1.75914	#NULL!	controls (all databases)	9
MVC-003F			#NULL!	#NULL!	#NULL!	1.66698	#NULL!	#VALUE!	#NULL!	controls (all databases)	9
MVC-003F			#NULL!	#NULL!	#NULL!	1.8089	#NULL!	#VALUE!	#NULL!	controls (all databases)	9
MVC-003F			#NULL!	1.97583	#NULL!	1.94383	#NULL!	1.95983	#NULL!	controls (all databases)	9
MVC-003F			#NULL!	1.8607	#NULL!	1.87945	#NULL!	1.87008	#NULL!	controls (all databases)	9
MVC-003F			#NULL!	1.86862	#NULL!	1.90228	#NULL!	1.88545	#NULL!	controls (all databases)	9
MVC-003F			#NULL!	1.72196	#NULL!	1.67452	#NULL!	1.69824	#NULL!	controls (all databases)	9
MVC-003F			#NULL!	1.96642	#NULL!	1.89165	#NULL!	1.92904	#NULL!	controls (all databases)	9
MVC-003F			#NULL!	1.87782	#NULL!	1.8741	#NULL!	1.87596	#NULL!	controls (all databases)	9
MVC-003F			#NULL!	1.84926	#NULL!	1.82896	#NULL!	1.83911	#NULL!	controls (all databases)	9
MVC-003F			#NULL!	1.99756	#NULL!	2.22835	#NULL!	2.11295	#NULL!	controls (all databases)	9
MVC-003F			#NULL!	#NULL!	#NULL!	2.02915	#NULL!	#VALUE!	#NULL!	controls (all databases)	9
MVC-003F			#NULL!	2.01907	#NULL!	1.97147	#NULL!	1.99527	#NULL!	controls (all databases)	9
MVC-003F			#NULL!	1.77497	#NULL!	1.8498	#NULL!	1.81238	#NULL!	controls (all databases)	9
MVC-003F			#NULL!	1.98717	#NULL!	1.98919	#NULL!	1.98818	#NULL!	controls (all databases)	9
MVC-003F			#NULL!	#NULL!	#NULL!	2.03517	#NULL!	#VALUE!	#NULL!	controls (all databases)	9
MVC-003F			#NULL!	1.8459	#NULL!	1.84283	#NULL!	1.84436	#NULL!	controls (all databases)	9
MVC-003F			#NULL!	1.94476	#NULL!	1.9232	#NULL!	1.93398	#NULL!	controls (all databases)	9
MVC-003F			#NULL!	2.20717	#NULL!	2.21135	#NULL!	2.20926	#NULL!	controls (all databases)	9
MVC-003F			#NULL!	2.09802	#NULL!	2.20844	#NULL!	2.15323	#NULL!	controls (all databases)	9
MVC-003F			#NULL!	1.68009	#NULL!	1.69313	#NULL!	1.68661	#NULL!	controls (all databases)	9
MVC-003F			#NULL!	2.05322	#NULL!	2.08155	#NULL!	2.06738	#NULL!	controls (all databases)	9
MVC-003F			#NULL!	1.91611	#NULL!	1.94271	#NULL!	1.92941	#NULL!	controls (all databases)	9
MVC-003F			#NULL!	1.69734	#NULL!	1.68209	#NULL!	1.68972	#NULL!	controls (all databases)	9
MVC-003F			#NULL!	1.9081	#NULL!	1.95388	#NULL!	1.93099	#NULL!	controls (all databases)	9
MVC-003F			#NULL!	1.9347	#NULL!	1.96344	#NULL!	1.94907	#NULL!	controls (all databases)	9
MVC-003F			#NULL!	1.90531	#NULL!	1.93885	#NULL!	1.92208	#NULL!	controls (all databases)	9
MVC-003F			#NULL!	2.11555	#NULL!	2.13396	#NULL!	2.12475	#NULL!	controls (all databases)	9
MVC-003F			#NULL!	#NULL!	#NULL!	1.71972	#NULL!	#VALUE!	#NULL!	controls (all databases)	9
MVC-003F			#NULL!	1.82333	#NULL!	1.83209	#NULL!	1.82771	#NULL!	controls (all databases)	9
MVC-003F			#NULL!	1.85244	#NULL!	1.88346	#NULL!	1.86795	#NULL!	controls (all databases)	9
MVC-003F			#NULL!	1.74982	#NULL!	1.77226	#NULL!	1.76104	#NULL!	controls (all databases)	9
MVC-003F			#NULL!	1.88913	#NULL!	1.98164	#NULL!	1.93539	#NULL!	controls (all databases)	9
MVC-003F			#NULL!	1.81055	#NULL!	1.87797	#NULL!	1.84426	#NULL!	controls (all databases)	9
MVC-003F			#NULL!	2.06255	#NULL!	2.09824	#NULL!	2.0804	#NULL!	controls (all databases)	9
MVC-003F			#NULL!	#NULL!	#NULL!	1.81341	#NULL!	#VALUE!	#NULL!	controls (all databases)	9
MVC-003F			#NULL!	#NULL!	#NULL!	1.92482	#NULL!	#VALUE!	#NULL!	controls (all databases)	9
MVC-003F			#NULL!	2.03942	#NULL!	2.0109	#NULL!	2.02516	#NULL!	controls (all databases)	9
MVC-003F			#NULL!	1.95239	#NULL!	1.92285	#NULL!	1.93762	#NULL!	controls (all databases)	9
MVC-003F			#NULL!	2.1665	#NULL!	2.22272	#NULL!	2.19461	#NULL!	controls (all databases)	9
MVC-003F			#NULL!	1.78257	#NULL!	1.76233	#NULL!	1.77245	#NULL!	controls (all databases)	9
MVC-003F			#NULL!	1.88139	#NULL!	1.9408	#NULL!	1.91109	#NULL!	controls (all databases)	9
MVC-003F			#NULL!	1.76083	#NULL!	1.78195	#NULL!	1.77139	#NULL!	controls (all databases)	9
MVC-003F			#NULL!	2.07899	#NULL!	2.10146	#NULL!	2.09022	#NULL!	controls (all databases)	9
MVC-003F			#NULL!	1.95763	#NULL!	2.03965	#NULL!	1.99864	#NULL!	controls (all databases)	9
MVC-003F			#NULL!	2.09222	#NULL!	2.11766	#NULL!	2.10494	#NULL!	controls (all databases)	9
MVC-003F			#NULL!	1.93829	#NULL!	1.9002	#NULL!	1.91925	#NULL!	controls (all databases)	9
MVC-003F			#NULL!	2.08771	#NULL!	2.18835	#NULL!	2.13803	#NULL!	controls (all databases)	9
MVC-003F			#NULL!	2.12113	#NULL!	2.2348	#NULL!	2.17797	#NULL!	controls (all databases)	9
MVC-003F			#NULL!	1.96744	#NULL!	1.99559	#NULL!	1.98152	#NULL!	controls (all databases)	9
MVC-003F			#NULL!	1.90577	#NULL!	1.97485	#NULL!	1.94031	#NULL!	controls (all databases)	9
MVC-003F			#NULL!	#NULL!	#NULL!	1.66176	#NULL!	#VALUE!	#NULL!	controls (all databases)	9
MVC-003F			#NULL!	1.92078	#NULL!	2.01962	#NULL!	1.9702	#NULL!	controls (all databases)	9
MVC-003F			#NULL!	1.69542	#NULL!	1.7445	#NULL!	1.71996	#NULL!	controls (all databases)	9
MVC-003F			#NULL!	1.72557	#NULL!	1.81938	#NULL!	1.77248	#NULL!	controls (all databases)	9
MVC-003F			#NULL!	1.85071	#NULL!	1.93712	#NULL!	1.89392	#NULL!	controls (all databases)	9
MVC-003F			#NULL!	2.1927	#NULL!	1.93622	#NULL!	2.06446	#NULL!	controls (all databases)	9
MVC-003F			#NULL!	1.78755	#NULL!	1.82782	#NULL!	1.80769	#NULL!	controls (all databases)	9
MVC-003F			#NULL!	1.84688	#NULL!	1.9313	#NULL!	1.88909	#NULL!	controls (all databases)	9
MVC-003F			#NULL!	1.81554	#NULL!	1.86563	#NULL!	1.84059	#NULL!	controls (all databases)	9
MVC-003F			#NULL!	1.78459	#NULL!	1.77069	#NULL!	1.77764	#NULL!	controls (all databases)	9
MVC-003F			#NULL!	1.91634	#NULL!	1.92944	#NULL!	1.92289	#NULL!	controls (all databases)	9
MVC-003F			#NULL!	1.79602	#NULL!	1.81234	#NULL!	1.80418	#NULL!	controls (all databases)	9
MVC-003F			#NULL!	1.93333	#NULL!	1.91451	#NULL!	1.92392	#NULL!	controls (all databases)	9
MVC-003F			#NULL!	1.85967	#NULL!	1.90037	#NULL!	1.88002	#NULL!	controls (all databases)	9
MVC-003F			#NULL!	1.80326	#NULL!	1.93602	#NULL!	1.86964	#NULL!	controls (all databases)	9
MVC-006F			#NULL!	#NULL!	#NULL!	1.8532	#NULL!	#VALUE!	#NULL!	controls (all databases)	9
MVC-006F			#NULL!	1.9807	#NULL!	1.93765	#NULL!	1.95918	#NULL!	controls (all databases)	9
MVC-010			#NULL!	1.88394	#NULL!	1.8572	#NULL!	1.87057	#NULL!	controls (all databases)	9
004_o_m_			#NULL!	1.6428	#NULL!	1.63913	#NULL!	1.64096	#NULL!	controls (all databases)	10
007_m_m_			#NULL!	1.86599	#NULL!	1.90735	#NULL!	1.88667	#NULL!	controls (all databases)	10
015_o_m_			#NULL!	1.79928	#NULL!	1.84828	#NULL!	1.82378	#NULL!	controls (all databases)	10
018_o_m_			#NULL!	1.82537	#NULL!	1.83495	#NULL!	1.83016	#NULL!	controls (all databases)	10
026_m_m_			#NULL!	1.91307	#NULL!	1.9493	#NULL!	1.93119	#NULL!	controls (all databases)	10
027_o_m_			#NULL!	1.9334	#NULL!	1.95346	#NULL!	1.94343	#NULL!	controls (all databases)	10
033_o_m_			#NULL!	1.81791	#NULL!	1.82869	#NULL!	1.8233	#NULL!	controls (all databases)	10
039_o_m_			#NULL!	1.9524	#NULL!	1.99023	#NULL!	1.97131	#NULL!	controls (all databases)	10
042_o_m_			#NULL!	#NULL!	#NULL!	2.08189	#NULL!	#VALUE!	#NULL!	controls (all databases)	10
046_o_m_			#NULL!	1.80219	#NULL!	1.81342	#NULL!	1.80781	#NULL!	controls (all databases)	10
053_o_m_			#NULL!	#NULL!	#NULL!	2.10029	#NULL!	#VALUE!	#NULL!	controls (all databases)	10
056_m_m_			#NULL!	1.79152	#NULL!	2.163	#NULL!	1.97726	#NULL!	controls (all databases)	10
058_m_m_			#NULL!	2.00416	#NULL!	2.02157	#NULL!	2.01287	#NULL!	controls (all databases)	10
059_o_m_			#NULL!	2.17852	#NULL!	2.20526	#NULL!	2.19189	#NULL!	controls (all databases)	10
065_o_m_			#NULL!	1.84256	#NULL!	1.90845	#NULL!	1.8755	#NULL!	controls (all databases)	10
068_m_m_			#NULL!	1.88585	#NULL!	1.97572	#NULL!	1.93079	#NULL!	controls (all databases)	10
074_o_m_			#NULL!	1.8981	#NULL!	2.02352	#NULL!	1.96081	#NULL!	controls (all databases)	10
076_o_m_			#NULL!	1.85708	#NULL!	2.14421	#NULL!	2.00064	#NULL!	controls (all databases)	10
077_m_m_			#NULL!	1.91742	#NULL!	1.99137	#NULL!	1.95439	#NULL!	controls (all databases)	10
082_m_m_			#NULL!	1.90271	#NULL!	1.93094	#NULL!	1.91683	#NULL!	controls (all databases)	10
083_o_m_			#NULL!	2.03182	#NULL!	2.11037	#NULL!	2.0711	#NULL!	controls (all databases)	10
091_o_m_			#NULL!	1.79271	#NULL!	1.82309	#NULL!	1.8079	#NULL!	controls (all databases)	10
092_m_m_			#NULL!	1.88923	#NULL!	2.21987	#NULL!	2.05455	#NULL!	controls (all databases)	10
102_o_m_			#NULL!	1.79707	#NULL!	1.82415	#NULL!	1.81061	#NULL!	controls (all databases)	10
107_o_m_			#NULL!	1.66087	#NULL!	1.92941	#NULL!	1.79514	#NULL!	controls (all databases)	10
108_m_m_			#NULL!	1.89158	#NULL!	2.20095	#NULL!	2.04626	#NULL!	controls (all databases)	10
118_o_m_			#NULL!	1.82882	#NULL!	1.91865	#NULL!	1.87374	#NULL!	controls (all databases)	10
121_o_m_			#NULL!	1.6963	#NULL!	1.88978	#NULL!	1.79304	#NULL!	controls (all databases)	10
126_m_m_			#NULL!	1.81139	#NULL!	1.79696	#NULL!	1.80418	#NULL!	controls (all databases)	10
131_o_m_			#NULL!	1.77894	#NULL!	1.79634	#NULL!	1.78764	#NULL!	controls (all databases)	10
137_o_m_			#NULL!	1.92693	#NULL!	2.14432	#NULL!	2.03563	#NULL!	controls (all databases)	10
141_o_m_			#NULL!	1.83537	#NULL!	2.10056	#NULL!	1.96796	#NULL!	controls (all databases)	10
142_m_m_			#NULL!	1.72479	#NULL!	1.93405	#NULL!	1.82942	#NULL!	controls (all databases)	10
146_o_m_			#NULL!	1.91905	#NULL!	1.98313	#NULL!	1.95109	#NULL!	controls (all databases)	10
149_m_m_			#NULL!	2.00537	#NULL!	2.09142	#NULL!	2.0484	#NULL!	controls (all databases)	10
151_o_m_			#NULL!	1.73226	#NULL!	1.68852	#NULL!	1.71039	#NULL!	controls (all databases)	10
159_m_m_			#NULL!	1.69655	#NULL!	1.91113	#NULL!	1.80384	#NULL!	controls (all databases)	10
161_o_m_			#NULL!	1.89887	#NULL!	2.04454	#NULL!	1.97171	#NULL!	controls (all databases)	10
165_m_m_			#NULL!	1.75841	#NULL!	1.79482	#NULL!	1.77662	#NULL!	controls (all databases)	10
166_o_m_			#NULL!	1.84135	#NULL!	1.82836	#NULL!	1.83485	#NULL!	controls (all databases)	10
172_o_m_			#NULL!	1.90467	#NULL!	1.98672	#NULL!	1.94569	#NULL!	controls (all databases)	10
176_o_m_			#NULL!	1.81197	#NULL!	1.86234	#NULL!	1.83716	#NULL!	controls (all databases)	10
s01_01			#NULL!	1.77827	#NULL!	1.80269	#NULL!	1.79048	#NULL!	controls (all databases)	11
s03_11			#NULL!	2.04427	#NULL!	2.16956	#NULL!	2.10692	#NULL!	controls (all databases)	11
s06_11			#NULL!	1.59022	#NULL!	1.5856	#NULL!	1.58791	#NULL!	controls (all databases)	11
s07_01			#NULL!	1.81112	#NULL!	1.87813	#NULL!	1.84463	#NULL!	controls (all databases)	11
s08_01			#NULL!	1.78912	#NULL!	1.85484	#NULL!	1.82198	#NULL!	controls (all databases)	11
s09_06			#NULL!	1.80073	#NULL!	1.88112	#NULL!	1.84092	#NULL!	controls (all databases)	11
s11_06			#NULL!	1.74989	#NULL!	1.69162	#NULL!	1.72076	#NULL!	controls (all databases)	11
s13_01			#NULL!	1.88959	#NULL!	1.86469	#NULL!	1.87714	#NULL!	controls (all databases)	11
s14_01			#NULL!	1.95104	#NULL!	1.98531	#NULL!	1.96817	#NULL!	controls (all databases)	11
s15_13			#NULL!	#NULL!	#NULL!	1.60781	#NULL!	#VALUE!	#NULL!	controls (all databases)	11
s19_06			#NULL!	1.77123	#NULL!	1.80207	#NULL!	1.78665	#NULL!	controls (all databases)	11
s20_01			#NULL!	1.81692	#NULL!	1.8441	#NULL!	1.83051	#NULL!	controls (all databases)	11
s22_14			#NULL!	2.01584	#NULL!	2.02342	#NULL!	2.01963	#NULL!	controls (all databases)	11
s23_01			#NULL!	1.75676	#NULL!	1.73154	#NULL!	1.74415	#NULL!	controls (all databases)	11
s24_14			#NULL!	#NULL!	#NULL!	1.94892	#NULL!	#VALUE!	#NULL!	controls (all databases)	11
s25_12			#NULL!	1.79171	#NULL!	1.78867	#NULL!	1.79019	#NULL!	controls (all databases)	11
s28_11			#NULL!	1.96884	#NULL!	2.03733	#NULL!	2.00309	#NULL!	controls (all databases)	11
s29_05			#NULL!	1.66149	#NULL!	1.67281	#NULL!	1.66715	#NULL!	controls (all databases)	11
s32_02			#NULL!	1.91854	#NULL!	2.00374	#NULL!	1.96114	#NULL!	controls (all databases)	11
s33_08			#NULL!	1.7629	#NULL!	1.80706	#NULL!	1.78498	#NULL!	controls (all databases)	11
s34_04			#NULL!	2.02723	#NULL!	2.09035	#NULL!	2.05879	#NULL!	controls (all databases)	11
s35_15			#NULL!	1.77142	#NULL!	1.79904	#NULL!	1.78523	#NULL!	controls (all databases)	11
s36_13			#NULL!	2.06183	#NULL!	2.05656	#NULL!	2.0592	#NULL!	controls (all databases)	11
s38_05			#NULL!	1.71523	#NULL!	1.72099	#NULL!	1.71811	#NULL!	controls (all databases)	11
s45_01			#NULL!	1.73999	#NULL!	1.78257	#NULL!	1.76128	#NULL!	controls (all databases)	11
s46_10			#NULL!	1.75471	#NULL!	1.86526	#NULL!	1.80999	#NULL!	controls (all databases)	11
s48_13			#NULL!	1.7398	#NULL!	1.8395	#NULL!	1.78965	#NULL!	controls (all databases)	11
s49_02			#NULL!	1.88291	#NULL!	1.87928	#NULL!	1.88109	#NULL!	controls (all databases)	11
0000_000			#NULL!	1.689	#NULL!	1.66207	#NULL!	1.67553	#NULL!	controls (all databases)	12
0001_000			#NULL!	1.76072	#NULL!	1.73691	#NULL!	1.74881	#NULL!	controls (all databases)	12
0003_000			#NULL!	1.79237	#NULL!	1.80743	#NULL!	1.7999	#NULL!	controls (all databases)	12
0005_16			#NULL!	1.77007	#NULL!	1.77747	#NULL!	1.77377	#NULL!	controls (all databases)	12
0006_001			#NULL!	1.5417	#NULL!	1.58959	#NULL!	1.56564	#NULL!	controls (all databases)	12
0008_002			#NULL!	1.75311	#NULL!	1.71467	#NULL!	1.73389	#NULL!	controls (all databases)	12
m1-5			#NULL!	#NULL!	#NULL!	1.84284	#NULL!	#VALUE!	#NULL!	controls (all databases)	13
m2-5			#NULL!	#NULL!	#NULL!	2.16752	#NULL!	#VALUE!	#NULL!	controls (all databases)	13
m3-5			#NULL!	1.8791	#NULL!	1.93216	#NULL!	1.90563	#NULL!	controls (all databases)	13
m4-5			#NULL!	1.9948	#NULL!	2.077	#NULL!	2.0359	#NULL!	controls (all databases)	13
m5-3			#NULL!	#NULL!	#NULL!	1.88204	#NULL!	#VALUE!	#NULL!	controls (all databases)	13
m8-5			#NULL!	1.72602	#NULL!	1.8	#NULL!	1.76301	#NULL!	controls (all databases)	13
m10-5			#NULL!	1.96543	#NULL!	1.98099	#NULL!	1.97321	#NULL!	controls (all databases)	13
m11-5			#NULL!	1.90587	#NULL!	1.85892	#NULL!	1.8824	#NULL!	controls (all databases)	13
m13-5			#NULL!	1.71733	#NULL!	1.82272	#NULL!	1.77002	#NULL!	controls (all databases)	13
m17-5			#NULL!	1.8775	#NULL!	1.89983	#NULL!	1.88866	#NULL!	controls (all databases)	13
m23-5			#NULL!	2.06179	#NULL!	2.07468	#NULL!	2.06823	#NULL!	controls (all databases)	13
m25-5			#NULL!	1.74661	#NULL!	1.78939	#NULL!	1.768	#NULL!	controls (all databases)	13
m30-5			#NULL!	1.66142	#NULL!	1.66397	#NULL!	1.6627	#NULL!	controls (all databases)	13
m32-5			#NULL!	1.70328	#NULL!	1.73458	#NULL!	1.71893	#NULL!	controls (all databases)	13
m34-5			#NULL!	#NULL!	#NULL!	1.62515	#NULL!	#VALUE!	#NULL!	controls (all databases)	13
m36-5			#NULL!	1.75239	#NULL!	1.85424	#NULL!	1.80331	#NULL!	controls (all databases)	13
m37-5			#NULL!	1.95389	#NULL!	1.97493	#NULL!	1.96441	#NULL!	controls (all databases)	13
m38-5			#NULL!	1.97003	#NULL!	2.06725	#NULL!	2.01864	#NULL!	controls (all databases)	13
m39-6			#NULL!	1.87134	#NULL!	1.92805	#NULL!	1.8997	#NULL!	controls (all databases)	13
m41-5			#NULL!	1.77422	#NULL!	1.76566	#NULL!	1.76994	#NULL!	controls (all databases)	13
m42-5			#NULL!	1.6799	#NULL!	1.73886	#NULL!	1.70938	#NULL!	controls (all databases)	13
m43-5			#NULL!	1.87056	#NULL!	1.88967	#NULL!	1.88011	#NULL!	controls (all databases)	13
m44-5			#NULL!	1.9418	#NULL!	1.92621	#NULL!	1.93401	#NULL!	controls (all databases)	13
m45-5			#NULL!	#NULL!	#NULL!	2.04937	#NULL!	#VALUE!	#NULL!	controls (all databases)	13
m47-5			#NULL!	1.97777	#NULL!	1.96229	#NULL!	1.97003	#NULL!	controls (all databases)	13
m48-5			#NULL!	1.84611	#NULL!	1.94697	#NULL!	1.89654	#NULL!	controls (all databases)	13
m49-5			#NULL!	#NULL!	#NULL!	1.62786	#NULL!	#VALUE!	#NULL!	controls (all databases)	13
m50-5			#NULL!	1.84858	#NULL!	1.91463	#NULL!	1.88161	#NULL!	controls (all databases)	13
m51-5			#NULL!	1.93619	#NULL!	1.97062	#NULL!	1.9534	#NULL!	controls (all databases)	13
m52-5			#NULL!	1.85437	#NULL!	1.89724	#NULL!	1.87581	#NULL!	controls (all databases)	13
m53-5			#NULL!	1.9513	#NULL!	1.95015	#NULL!	1.95073	#NULL!	controls (all databases)	13
m54-5			#NULL!	1.68121	#NULL!	1.78294	#NULL!	1.73208	#NULL!	controls (all databases)	13
m55-5			#NULL!	1.77485	#NULL!	1.73184	#NULL!	1.75334	#NULL!	controls (all databases)	13
m56-5			#NULL!	1.90133	#NULL!	1.91537	#NULL!	1.90835	#NULL!	controls (all databases)	13
m57-5			#NULL!	1.68752	#NULL!	1.70849	#NULL!	1.69801	#NULL!	controls (all databases)	13
m58-5			#NULL!	1.83584	#NULL!	1.9134	#NULL!	1.87462	#NULL!	controls (all databases)	13
m59-5			#NULL!	1.89486	#NULL!	1.9965	#NULL!	1.94568	#NULL!	controls (all databases)	13
m60-5			#NULL!	1.77791	#NULL!	1.85754	#NULL!	1.81772	#NULL!	controls (all databases)	13
m63-5			#NULL!	1.81274	#NULL!	1.85728	#NULL!	1.83501	#NULL!	controls (all databases)	13
m64-5			#NULL!	1.86942	#NULL!	1.845	#NULL!	1.85721	#NULL!	controls (all databases)	13
m65-5			#NULL!	1.79346	#NULL!	1.81441	#NULL!	1.80394	#NULL!	controls (all databases)	13
m66-5			#NULL!	1.9506	#NULL!	1.95165	#NULL!	1.95112	#NULL!	controls (all databases)	13
m67-5			#NULL!	2.22363	#NULL!	2.27578	#NULL!	2.2497	#NULL!	controls (all databases)	13
m68-5			#NULL!	1.85498	#NULL!	1.84398	#NULL!	1.84948	#NULL!	controls (all databases)	13
m69-5			#NULL!	1.64929	#NULL!	1.63172	#NULL!	1.64051	#NULL!	controls (all databases)	13
m70-5			#NULL!	1.60708	#NULL!	1.67125	#NULL!	1.63917	#NULL!	controls (all databases)	13
m71-5			#NULL!	1.73928	#NULL!	1.80544	#NULL!	1.77236	#NULL!	controls (all databases)	13
m72-5			#NULL!	1.91602	#NULL!	1.95882	#NULL!	1.93742	#NULL!	controls (all databases)	13
m73-5			#NULL!	1.92607	#NULL!	1.95327	#NULL!	1.93967	#NULL!	controls (all databases)	13
m74-5			#NULL!	1.80981	#NULL!	1.80316	#NULL!	1.80649	#NULL!	controls (all databases)	13
m75-5			#NULL!	2.00527	#NULL!	1.96975	#NULL!	1.98751	#NULL!	controls (all databases)	13
m76-5			#NULL!	1.8724	#NULL!	1.94816	#NULL!	1.91028	#NULL!	controls (all databases)	13
m77-5			#NULL!	1.95516	#NULL!	1.93615	#NULL!	1.94565	#NULL!	controls (all databases)	13
m78-5			#NULL!	1.77967	#NULL!	1.76131	#NULL!	1.77049	#NULL!	controls (all databases)	13
m80-5			#NULL!	1.98677	#NULL!	2.10468	#NULL!	2.04573	#NULL!	controls (all databases)	13
m81-5			#NULL!	1.94312	#NULL!	2.01657	#NULL!	1.97985	#NULL!	controls (all databases)	13
m83-5			#NULL!	1.887	#NULL!	2.00266	#NULL!	1.94483	#NULL!	controls (all databases)	13
m84-5			#NULL!	1.91417	#NULL!	2.0259	#NULL!	1.97003	#NULL!	controls (all databases)	13
m86-5			#NULL!	1.84264	#NULL!	1.86096	#NULL!	1.8518	#NULL!	controls (all databases)	13
m88-5			#NULL!	1.6147	#NULL!	1.62471	#NULL!	1.61971	#NULL!	controls (all databases)	13
m90-5			#NULL!	2.02765	#NULL!	2.07286	#NULL!	2.05025	#NULL!	controls (all databases)	13
m91-5			#NULL!	1.84286	#NULL!	1.99314	#NULL!	1.918	#NULL!	controls (all databases)	13
m92-5			#NULL!	1.74125	#NULL!	1.80061	#NULL!	1.77093	#NULL!	controls (all databases)	13
m93-5			#NULL!	1.69418	#NULL!	1.70369	#NULL!	1.69894	#NULL!	controls (all databases)	13
m94-5			#NULL!	1.63833	#NULL!	1.66916	#NULL!	1.65374	#NULL!	controls (all databases)	13
m95-5			#NULL!	2.01217	#NULL!	2.05529	#NULL!	2.03373	#NULL!	controls (all databases)	13
m96-5			#NULL!	1.87368	#NULL!	1.90547	#NULL!	1.88957	#NULL!	controls (all databases)	13
m99-5			#NULL!	2.05719	#NULL!	2.16425	#NULL!	2.11072	#NULL!	controls (all databases)	13
m100-5			#NULL!	1.84735	#NULL!	1.84313	#NULL!	1.84524	#NULL!	controls (all databases)	13
m1v1e1			#NULL!	1.64511	#NULL!	1.6591	#NULL!	1.6521	#NULL!	controls (all databases)	14
m2v1e1			#NULL!	1.77408	#NULL!	1.81204	#NULL!	1.79306	#NULL!	controls (all databases)	14
m3v1e1			#NULL!	1.55343	#NULL!	1.63828	#NULL!	1.59586	#NULL!	controls (all databases)	14
m5v1e1			#NULL!	1.74344	#NULL!	1.78771	#NULL!	1.76558	#NULL!	controls (all databases)	14
m6v1e1			#NULL!	1.75514	#NULL!	1.72302	#NULL!	1.73908	#NULL!	controls (all databases)	14
m7v1e1			#NULL!	1.72676	#NULL!	1.71774	#NULL!	1.72225	#NULL!	controls (all databases)	14
m8v1e1			#NULL!	#NULL!	#NULL!	1.69143	#NULL!	#VALUE!	#NULL!	controls (all databases)	14
m9v1e1			#NULL!	1.95329	#NULL!	1.99989	#NULL!	1.97659	#NULL!	controls (all databases)	14
m10v1e1			#NULL!	1.94975	#NULL!	1.9569	#NULL!	1.95332	#NULL!	controls (all databases)	14
m11v1e1			#NULL!	1.88287	#NULL!	1.89281	#NULL!	1.88784	#NULL!	controls (all databases)	14
m12v1e1			#NULL!	1.54548	#NULL!	1.52998	#NULL!	1.53773	#NULL!	controls (all databases)	14
m13v1e1			#NULL!	1.82064	#NULL!	1.70185	#NULL!	1.76124	#NULL!	controls (all databases)	14
m14v1e1			#NULL!	1.79841	#NULL!	1.79604	#NULL!	1.79723	#NULL!	controls (all databases)	14
m15v1e1			#NULL!	1.74104	#NULL!	1.75448	#NULL!	1.74776	#NULL!	controls (all databases)	14
m16v1e1			#NULL!	1.79342	#NULL!	1.7485	#NULL!	1.77096	#NULL!	controls (all databases)	14
m17v1e2			#NULL!	1.80994	#NULL!	1.82587	#NULL!	1.81791	#NULL!	controls (all databases)	14
m18v1e1			#NULL!	#NULL!	#NULL!	1.48217	#NULL!	#VALUE!	#NULL!	controls (all databases)	14
m4001			#NULL!	1.79339	#NULL!	1.76148	#NULL!	1.77744	#NULL!	controls (all databases)	15
m4002			#NULL!	#NULL!	#NULL!	1.93687	#NULL!	#VALUE!	#NULL!	controls (all databases)	15
m4004			#NULL!	1.75868	#NULL!	1.73717	#NULL!	1.74793	#NULL!	controls (all databases)	15
m4006			#NULL!	1.75038	#NULL!	1.7751	#NULL!	1.76274	#NULL!	controls (all databases)	15
m4010			#NULL!	1.90213	#NULL!	1.90071	#NULL!	1.90142	#NULL!	controls (all databases)	15
m4011			#NULL!	1.86755	#NULL!	1.86169	#NULL!	1.86462	#NULL!	controls (all databases)	15
m4012_02			#NULL!	1.8219	#NULL!	1.81485	#NULL!	1.81838	#NULL!	controls (all databases)	15
m4014			#NULL!	1.72488	#NULL!	1.77329	#NULL!	1.74909	#NULL!	controls (all databases)	15
m4015			#NULL!	1.78338	#NULL!	1.76449	#NULL!	1.77394	#NULL!	controls (all databases)	15
m4016			#NULL!	1.90974	#NULL!	1.89298	#NULL!	1.90136	#NULL!	controls (all databases)	15
m4017			#NULL!	1.91872	#NULL!	1.95447	#NULL!	1.9366	#NULL!	controls (all databases)	15
m4018			#NULL!	1.70745	#NULL!	1.71199	#NULL!	1.70972	#NULL!	controls (all databases)	15
m4019			#NULL!	1.66301	#NULL!	1.62246	#NULL!	1.64274	#NULL!	controls (all databases)	15
m4020			#NULL!	#NULL!	#NULL!	2.06752	#NULL!	#VALUE!	#NULL!	controls (all databases)	15
m4021			#NULL!	1.6625	#NULL!	1.68014	#NULL!	1.67132	#NULL!	controls (all databases)	15
m4024			#NULL!	1.82789	#NULL!	1.88229	#NULL!	1.85509	#NULL!	controls (all databases)	15
m4025			#NULL!	#NULL!	#NULL!	1.87083	#NULL!	#VALUE!	#NULL!	controls (all databases)	15
m4026			#NULL!	1.86837	#NULL!	1.87936	#NULL!	1.87386	#NULL!	controls (all databases)	15
m4029			#NULL!	#NULL!	#NULL!	1.88226	#NULL!	#VALUE!	#NULL!	controls (all databases)	15
m4031			#NULL!	1.70042	#NULL!	1.71854	#NULL!	1.70948	#NULL!	controls (all databases)	15
m4032			#NULL!	#NULL!	#NULL!	1.52714	#NULL!	#VALUE!	#NULL!	controls (all databases)	15
m4034			#NULL!	1.91101	#NULL!	1.93564	#NULL!	1.92333	#NULL!	controls (all databases)	15
m4035			#NULL!	1.88131	#NULL!	1.96973	#NULL!	1.92552	#NULL!	controls (all databases)	15
m4040s			#NULL!	#NULL!	#NULL!	2.1979	#NULL!	#VALUE!	#NULL!	controls (all databases)	15
m4042			#NULL!	#NULL!	#NULL!	1.59025	#NULL!	#VALUE!	#NULL!	controls (all databases)	15
m4060			#NULL!	#NULL!	#NULL!	2.02564	#NULL!	#VALUE!	#NULL!	controls (all databases)	15
m4061			#NULL!	#NULL!	#NULL!	1.99988	#NULL!	#VALUE!	#NULL!	controls (all databases)	15
m4062			#NULL!	#NULL!	#NULL!	1.85771	#NULL!	#VALUE!	#NULL!	controls (all databases)	15
m4063			#NULL!	1.74825	#NULL!	1.70443	#NULL!	1.72634	#NULL!	controls (all databases)	15
m4064			#NULL!	1.71231	#NULL!	1.74859	#NULL!	1.73045	#NULL!	controls (all databases)	15
m4066			#NULL!	1.75112	#NULL!	1.76959	#NULL!	1.76035	#NULL!	controls (all databases)	15
m4067			#NULL!	1.75747	#NULL!	1.74613	#NULL!	1.7518	#NULL!	controls (all databases)	15
m4068			#NULL!	#NULL!	#NULL!	2.16553	#NULL!	#VALUE!	#NULL!	controls (all databases)	15
m4074a			#NULL!	1.80149	#NULL!	1.77735	#NULL!	1.78942	#NULL!	controls (all databases)	15
m4075			#NULL!	1.57827	#NULL!	1.51134	#NULL!	1.54481	#NULL!	controls (all databases)	15
m4076			#NULL!	1.75719	#NULL!	1.78664	#NULL!	1.77192	#NULL!	controls (all databases)	15
m4077			#NULL!	1.72332	#NULL!	1.70693	#NULL!	1.71513	#NULL!	controls (all databases)	15
m4078			#NULL!	1.82059	#NULL!	1.81464	#NULL!	1.81761	#NULL!	controls (all databases)	15
m4079			#NULL!	1.78849	#NULL!	1.7899	#NULL!	1.78919	#NULL!	controls (all databases)	15
m4080			#NULL!	#NULL!	#NULL!	1.6144	#NULL!	#VALUE!	#NULL!	controls (all databases)	15
